# Supplementary figures and images for: Assessment of the Pharmacokinetics, Pharmacodynamics, and Safety of Single Doses of TV‐1106, a Long‐Acting Growth Hormone, in Healthy Japanese and Caucasian Subjects
Source: PubMed Central journal article supplement — Clin Pharmacol Drug Dev. 2016 Sep 21;6(4):331–42. doi: 10.1002/cpdd.294 (PMC5516185; doi:10.1002/cpdd.294), 2016-09-21

Supplemental Figure S1: Subject Flow Chart

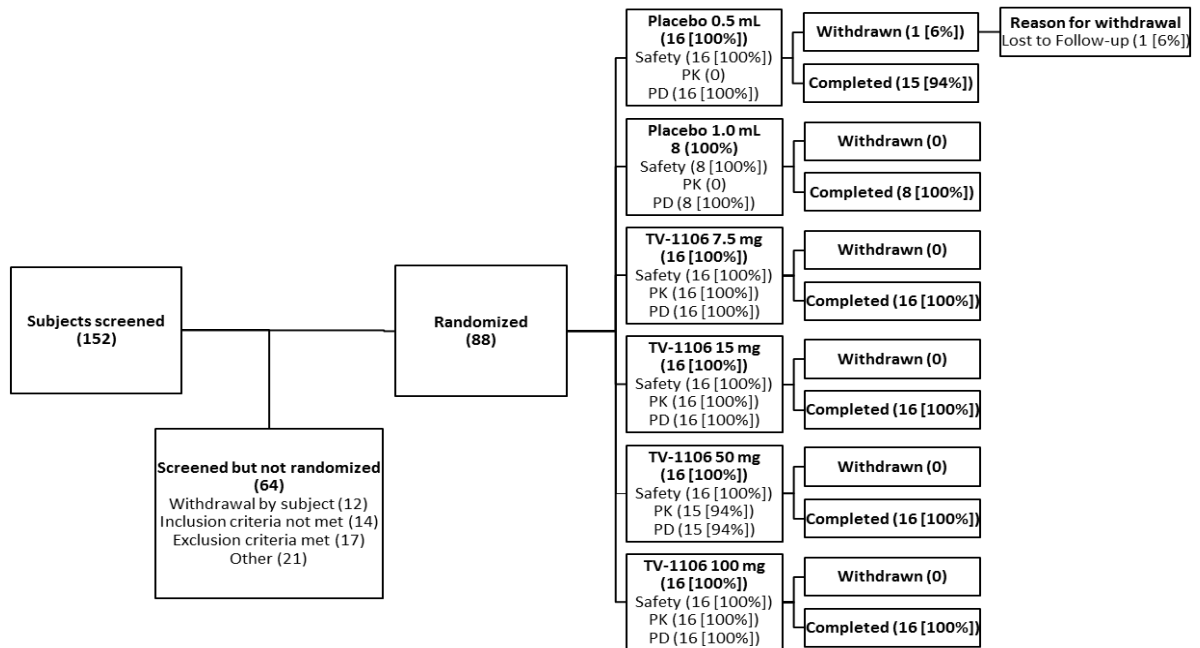

Supplement: CPDD-6-331-s001.pdf [file CPDD-6-331-s001.pdf]
